# Supplementary material
Source: publisher figshare collection journal article supplement (https://f1000.figshare.com/ndownloader/files/476591)
Supplement: Supplementary file 1 [file 476591]

			time (s)	time (s)			sucrose consumption (ml) during training
Rat	sucrose (ml)	froot loops (n)	paired	unpaired	difference (s)		d1	d2	d3	mean
1	15.6666666667	15	355	206	149		12	18	17	15.6666666667
4	9	16	251	281	-30		3	9	15	9
5	18	14	308	229	79		15	17	22	18
8	13.3333333333	14	484	158	326		10	13	17	13.3333333333
9	12.3333333333	15	430	368	62		10	12	15	12.3333333333
12	16.6666666667	17	303	383	-80		10	23	17	16.6666666667
13	11.3333333333	14	378	253	125		10	12	12	11.3333333333
16	14.3333333333	13	409	223	186		15	12	16	14.3333333333
mean	13.8333333333	14.75	364.75	262.625	102.125		10.625	14.5	16.375	13.8333333333
standard error of mean (SEM)	1.0446386175	0.4531634836	26.9521732492	27.6708572199	44.850321507		1.335470757	1.5923926293	0.9988833051	1.0446386175
